# Supplementary material for: A potential-gated molecularly imprinted smart electrode for nicotinamide analysis
Source: Royal Society of Chemistry journal article supplement (doi:10.1039/c5ra02697k), 2015-01-01
Supplement: c5ra02697k1.pdf [file c5ra02697k1.pdf]

## Supplementary Information

### Potential-gated molecularly imprinted smart electrode for nicotinamide analysis

Najmeh Karimian<sup>a,b</sup>, Mohammad Hossein Arbab Zavar<sup>b</sup>, Mahmoud Chamsaz<sup>b</sup>, Narges Ashraf<sup>b</sup>,  
Anthony P.F. Turner<sup>a</sup> and Ashutosh Tiwari<sup>a\*</sup>

*<sup>a</sup>Biosensors and Bioelectronics Centre, Department of Physics, Chemistry and Biology (IFM),  
Linköping University, S-58183 Linköping, Sweden*

*<sup>b</sup>Department of Chemistry, Faculty of Sciences, Ferdowsi University of Mashhad, Mashhad, Iran*

*<sup>c</sup>Tekidag AB, Mjärdevi Science Park, Teknikringen 4A, SE 583 30 Linköping, Sweden*

\*Corresponding author.

Tel: (+46) 1328 2395; Fax: (+46) 1313 7568; E-mail: ashutosh.tiwari@liu.se

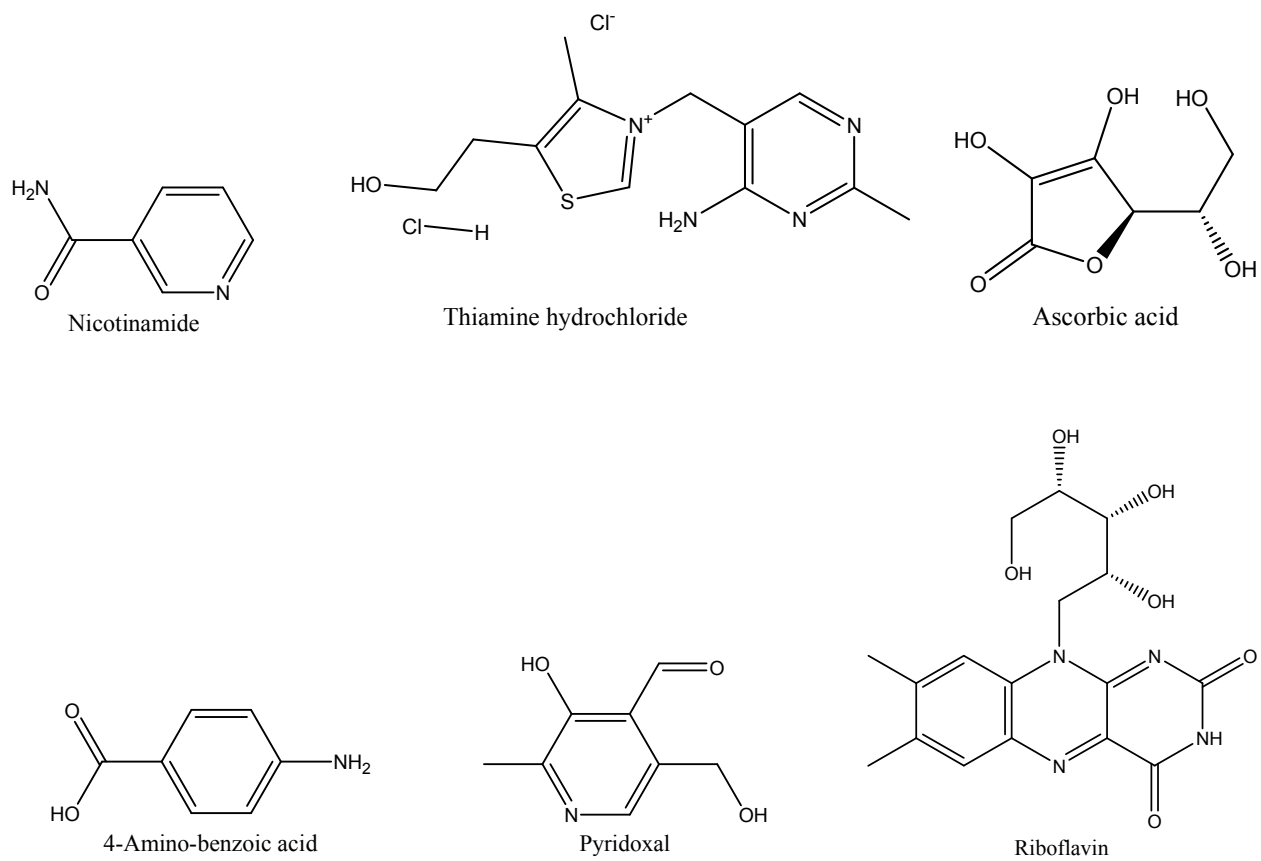

**Fig. S1.** Chemical structure of nicotinamide, thiamine hydrochloride, ascorbic acid, 4-Amino-benzoic acid, pyridoxal, riboflavin.

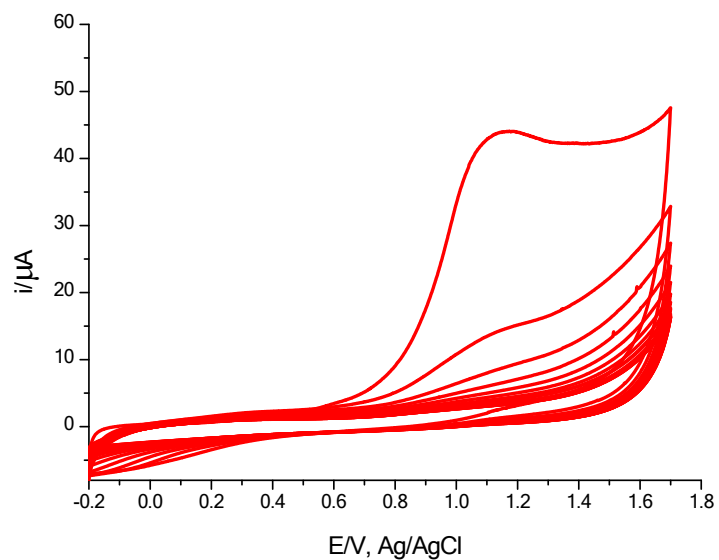

**Fig. S2.** Preparation of NIP electrode via electropolymerisation of pyrrole. Cyclic voltammogram for pyrrole electropolymerisation at a glassy carbon electrode. (Py: 50.0 mM, sodium perchlorate: 100.0 mM in aqueous solution, number of cycles = 16, potential range -0.2 to +1.7 V and scan rate  $100 \text{ mV s}^{-1}$ ).

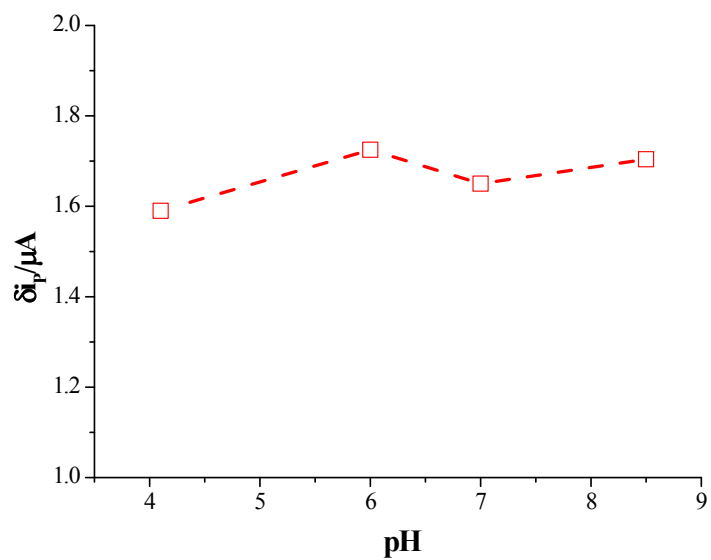

**Fig. S3.** Optimisation of factor affecting the performance of the modified electrode. Effect of pH on  $\delta i_p$  at the NAM/MIP-GCE in the solutions containing 0.5 mM  $\text{K}_3\text{Fe}(\text{CN})_6$ , 0.5 mM  $\text{K}_4\text{Fe}(\text{CN})_6$ , 0.1 M KCl in the presence of 15.0  $\mu\text{M}$  nicotinamide after 10 min incubation time.

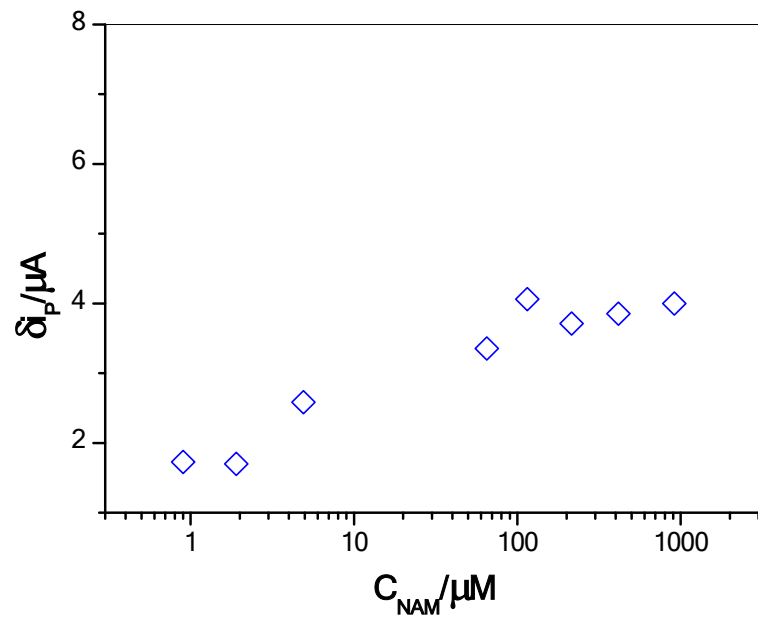

**Fig. S4.** The relationship between logarithm of the concentration of NAM and the current response of  $[\text{Fe}(\text{CN})_6]^{3-}/[\text{Fe}(\text{CN})_6]^{4-}$  on NIP-GCE.
